# Supplementary material for: The in situ formation of platinum nanoparticles and their catalytic role in electroactive phase formation in poly(vinylidene fluoride): a simple preparation of multifunctional poly(vinylidene fluoride) films doped with platinum nanoparticles
Source: Royal Society of Chemistry journal article supplement (doi:10.1039/c4ra06334a), 2014-01-01
Supplement: c4ra06334a1.pdf [file c4ra06334a1.pdf]

## ESI document

**The *in-situ* formation of platinum nanoparticles and their catalytic role in electroactive phase formation in poly(vinylidene fluoride): A simple preparation of multifunctional poly(vinylidene fluoride) films doped with platinum nanoparticles**

Sujoy Kumar Ghosh, Md. Mehebab Alam, Dipankar Mandal\*

Organic Nano-Piezoelectric Device Laboratory

Department of Physics, Jadavpur University, Kolkata-700032, India

## Methodology

The systematic study of the Pt-NPs doped PVDF films has been made by preparing the films under different concentration (0.025, 0.25, 0.50, 0.75, 1.0, 1.25 and 1.50 wt% ) of Pt-salt in PVDF-DMF solutions. The preparation method and indexing of the free standing films are same as mentioned in the main article.

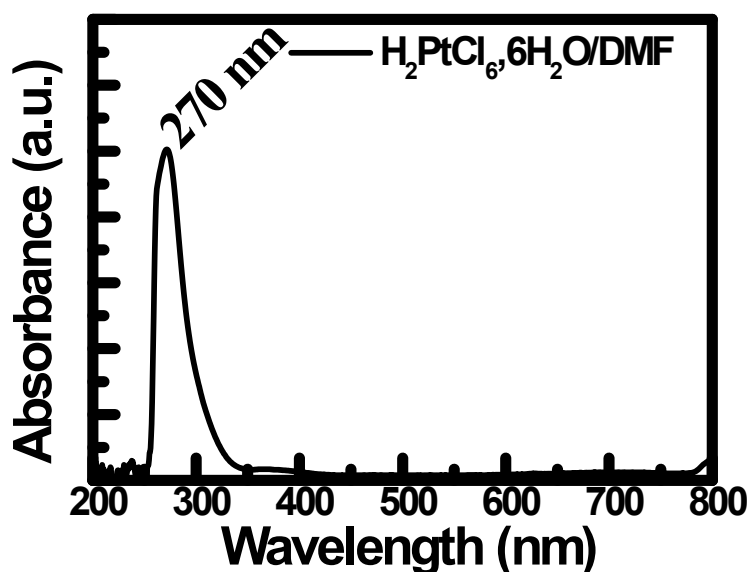

**Figure S1.** UV-Vis spectra of Pt-salt containing DMF solution.

This spectrum entertains the fact that H<sub>2</sub>PtCl<sub>6</sub>.6H<sub>2</sub>O / DMF solution shows no considerable absorption from visible to ultraviolet region except for an abrupt strong absorption at 270 nm due to the ligand-to-metal charge-transfer transition of the [PtCl<sub>6</sub>]<sup>2-</sup> ions (*i.e.*, due to the presence of Pt<sup>4+</sup> ions in the solution ; [PtCl<sub>6</sub>]<sup>2-</sup> ⇌ Pt<sup>4+</sup> + 6Cl<sup>-</sup>) which is not found in Pt-NPs doped PVDF films. Moreover, the formation of Pt-NPs usually take place while drying of the casted solution, *i.e.*, during the film formation. The proposed chemical reaction involved in this process is as follows:

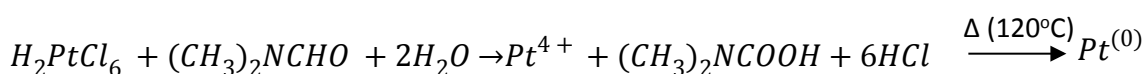

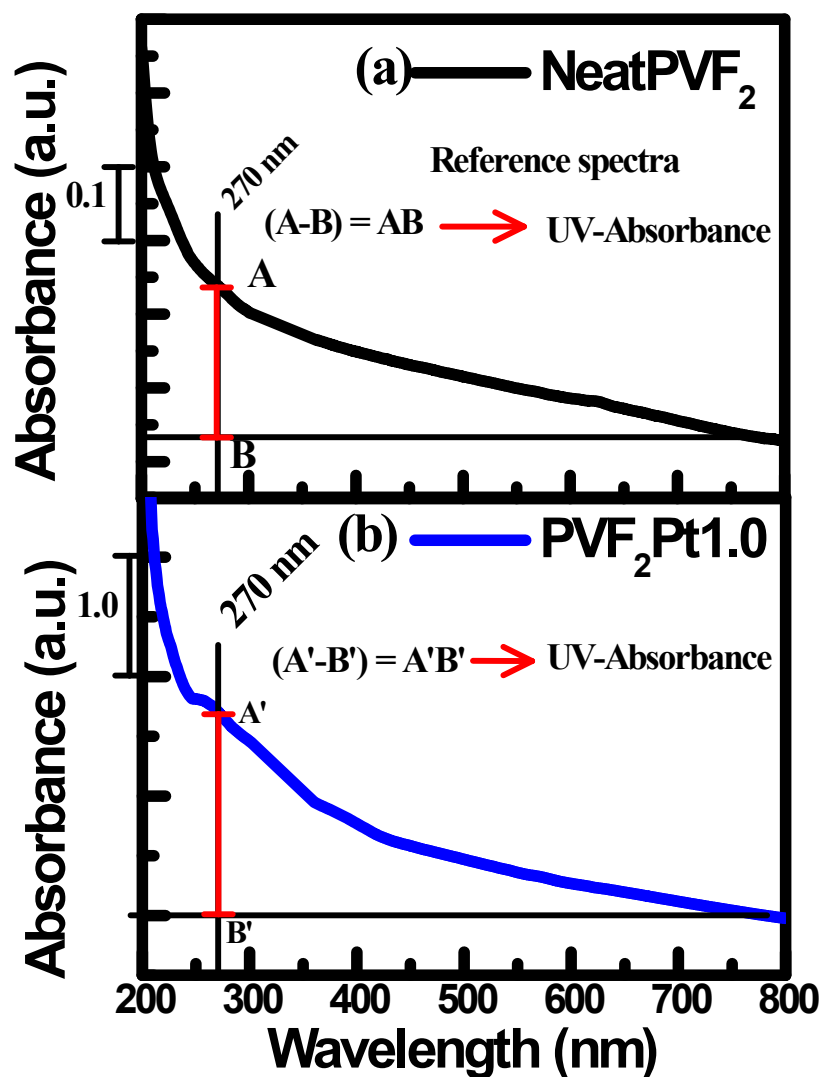

**Figure S2.** The degree of UV-Absorbance estimated from UV-Vis spectra where the absorbance at 270 nm (*i.e.*, AB shown in (a)) from NeatPVF<sub>2</sub> is taken as reference absorbance. Likewise, the absorbance at 270 nm from Pt-NPs doped PVDF films (for example, A'/B' in PVF<sub>2</sub>Pt1.0 film, shown in (b)) is considered.

The degree of UV-Absorption at 270 nm is calculated from UV-Vis spectra of Pt-NPs doped PVDF films considering NeatPVF<sub>2</sub> film as a reference as shown in Figure S2 (a~b) with the following equation.

$$\text{Degree of UV - Absorption} = |A'B' - AB| \times |t_f| \times 100\%$$

Where,  $|t_f|$  is the thickness factor.

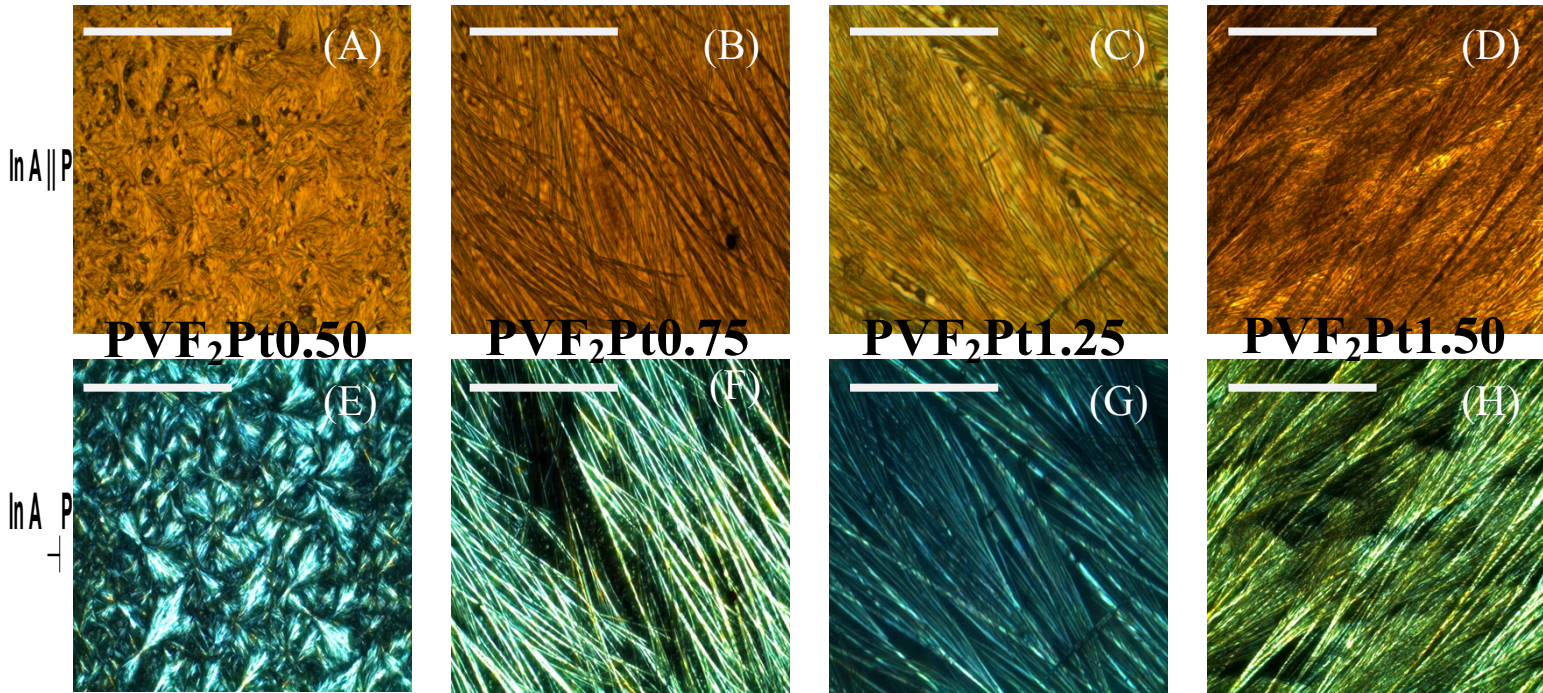

**Figure S3.** Optical microscopic images of PVF<sub>2</sub>Pt0.50, PVF<sub>2</sub>Pt0.75, PVF<sub>2</sub>Pt1.25, PVF<sub>2</sub>Pt1.50 films both in unpolarize (A||P) [A~D] and polarize (A⊥P) [E~H] modes. The scale bars given on the images are representing 100 μm in length.

The optical microscopic images of Pt-NPs doped PVDF films (PVF<sub>2</sub>Pt0.50, PVF<sub>2</sub>Pt0.75, PVF<sub>2</sub>Pt1.25 and PVF<sub>2</sub>Pt1.50) are shown in Figure S3. The morphology of these Pt-NPs doped PVDF films are in unpolarize mode (A||P) (Figure S3 (A~D)). The increasing tendency of fibril growths over the PVDF surface are observed with increasing concentration of Pt-salt. In cross polarize mode (A⊥P) (shown in Figure S3, E~H) the intense birefringent fibrils are visible and it obscures the typical small  $\gamma$  spherulitic structure in the surface of the film.

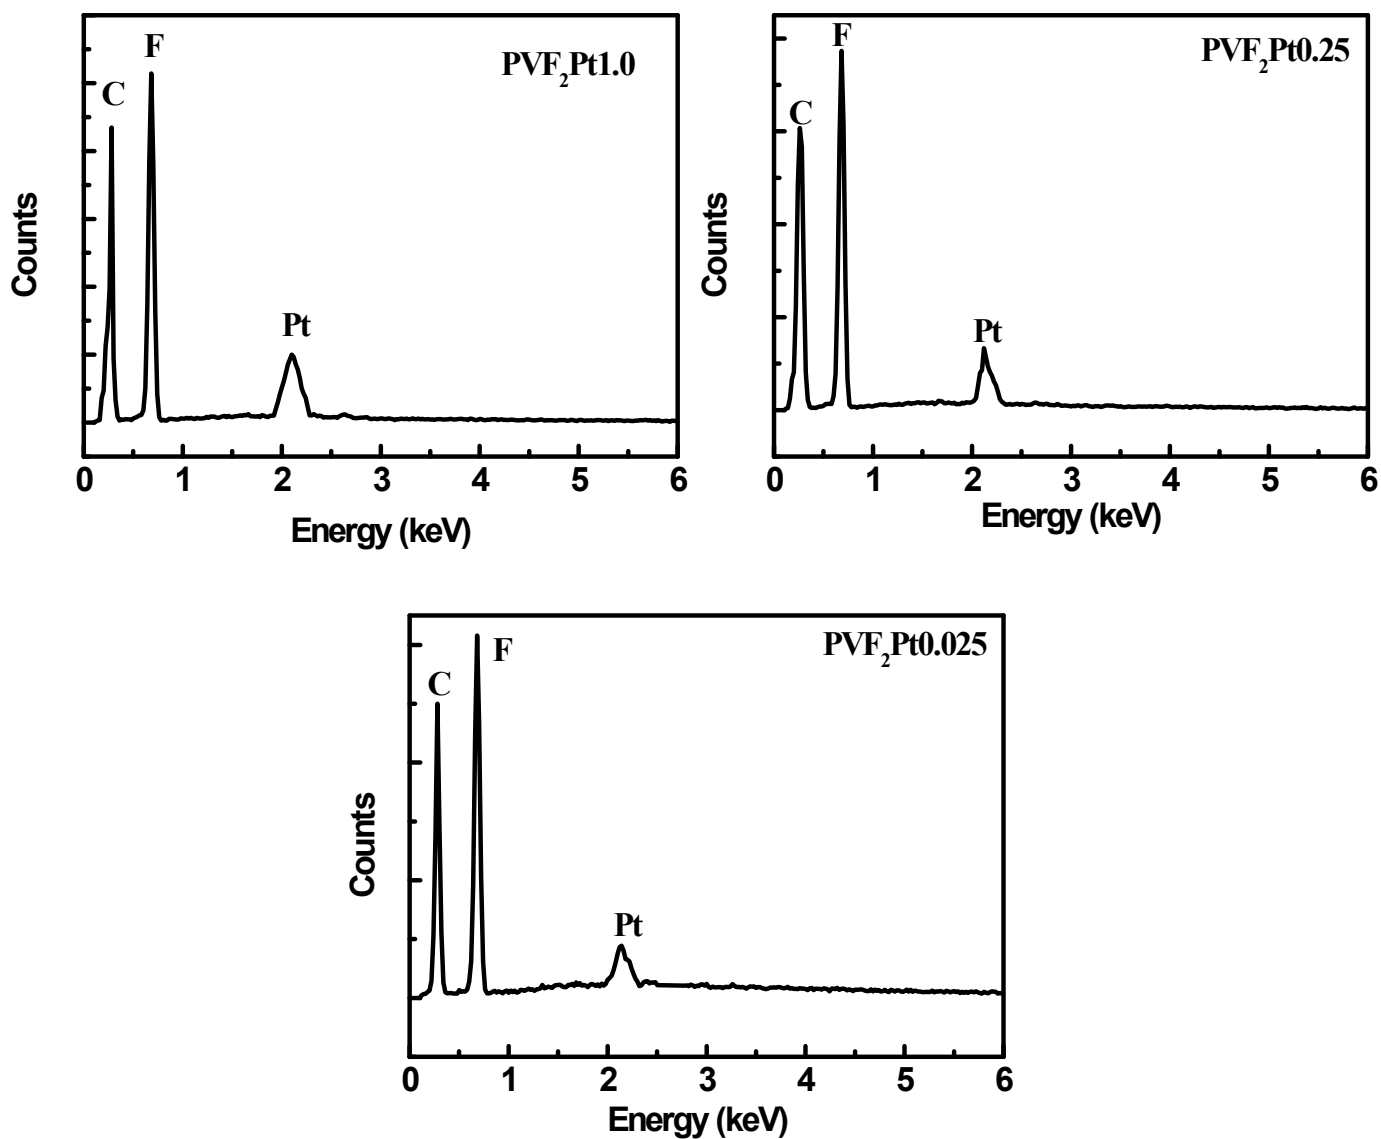

**Figure S4** EDS spectrum of Pt-NPs doped PVDF films. It exhibits almost equal (1:1) carbon(C) and fluoride (F) signal arising from PVDF and a prominent peak from elemental Pt.

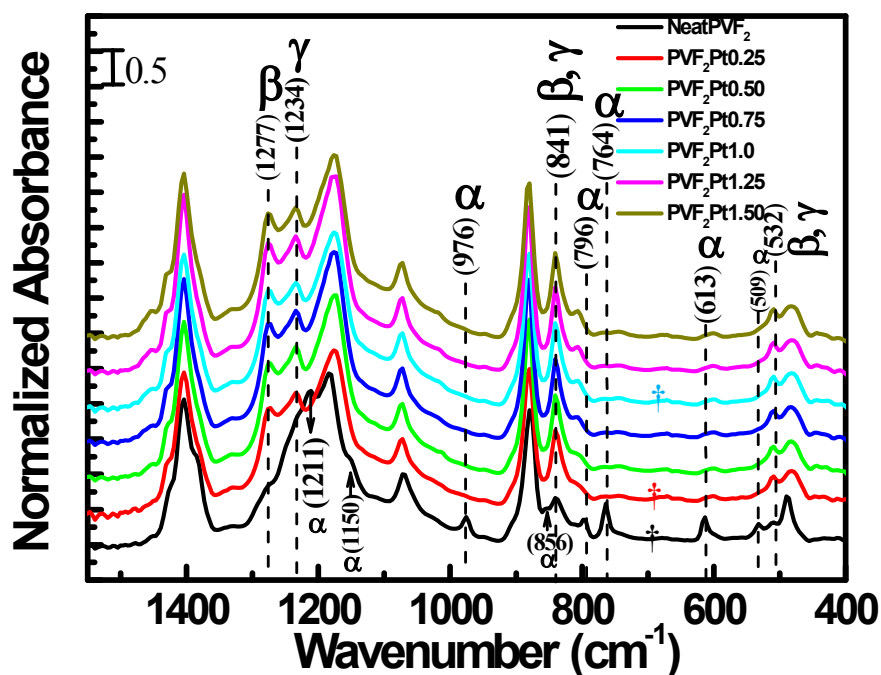

**Figure S5.** FT-IR spectra (1550 – 400  $\text{cm}^{-1}$  frequency region) of Pt-NPs added PVDF films. The † marked (with suitable colour code) samples are represented in the main article.

The FT-IR spectra of Pt-NPs doped PVDF films show a subsequent increase of 841  $\text{cm}^{-1}$  band with increasing amount of Pt-salt beyond 1.0 wt% , no further significant improvement is noticed. That means, in PVF<sub>2</sub>Pt1.0 film complete nucleation of electroactive phases has taken place.

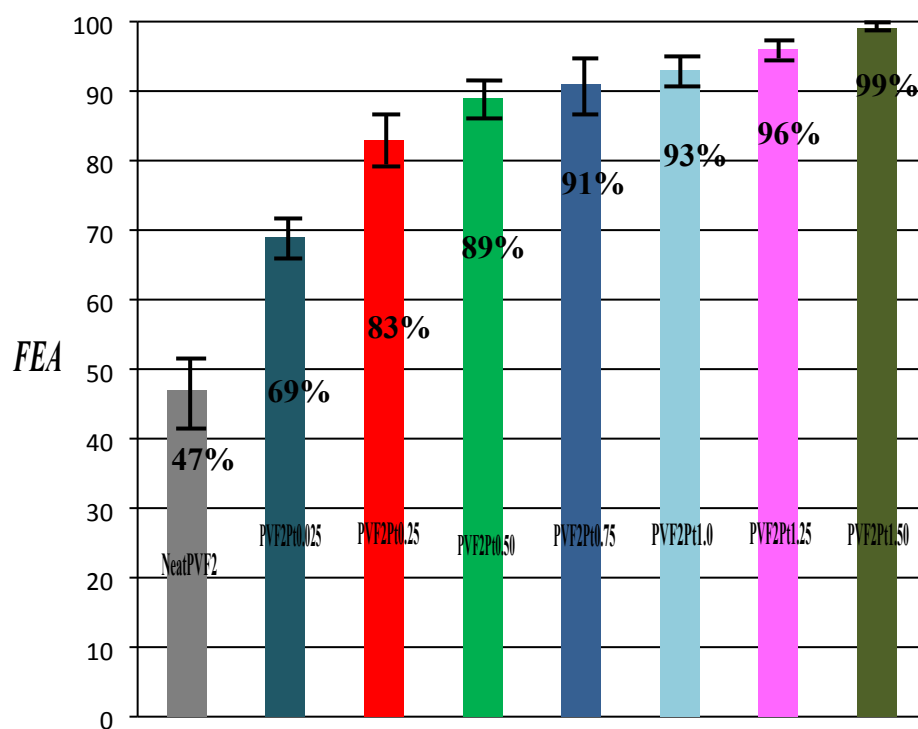

**Figure S6.** The percentage (%) of  $F_{EA}$  for NeatPVF<sub>2</sub> and Pt-NPs doped PVDF films

It is clearly observed that maximum of 99 % of electroactive phase can be achieved by 1.5 wt% of Pt-NPs doping in PVDF matrix. After 1.0 wt% of Pt-salt loading in PVDF, the percentage increase of  $F_{EA}$  in Pt-NPs doped PVDF films is not as steep as observed below that wt% of Pt-NPs loading in PVDF matrix.

**Table S7**

| Name of the Samples      | $\frac{\sum A_{cr}}{\sum A_{amr}}$ | $\chi_c = \frac{\sum A_{cr}}{\sum A_{cr} + \sum A_{amr}} \times 100\%$ |
|--------------------------|------------------------------------|------------------------------------------------------------------------|
| NeatPVF <sub>2</sub>     | 1.0                                | 50%                                                                    |
| PVF <sub>2</sub> Pt0.025 | 0.76                               | 43%                                                                    |
| PVF <sub>2</sub> Pt0.25  | 0.64                               | 39%                                                                    |
| PVF <sub>2</sub> Pt1.0   | 0.52                               | 34%                                                                    |

**Table S8**

| Sample Name              | $\chi_\beta(\%) = F(\beta) \times \chi_c(\%)$ | $\chi_\gamma(\%) = F(\gamma) \times \chi_c(\%)$ |
|--------------------------|-----------------------------------------------|-------------------------------------------------|
| PVF <sub>2</sub> Pt0.025 | 21 %                                          | 9 %                                             |
| PVF <sub>2</sub> Pt0.25  | 28 %                                          | 4 %                                             |
| PVF <sub>2</sub> Pt1.0   | 30 %                                          | 2 %                                             |

Footnote: Here  $F(\beta)$  and  $F(\gamma)$  is obtained from Figure 8 of main article.



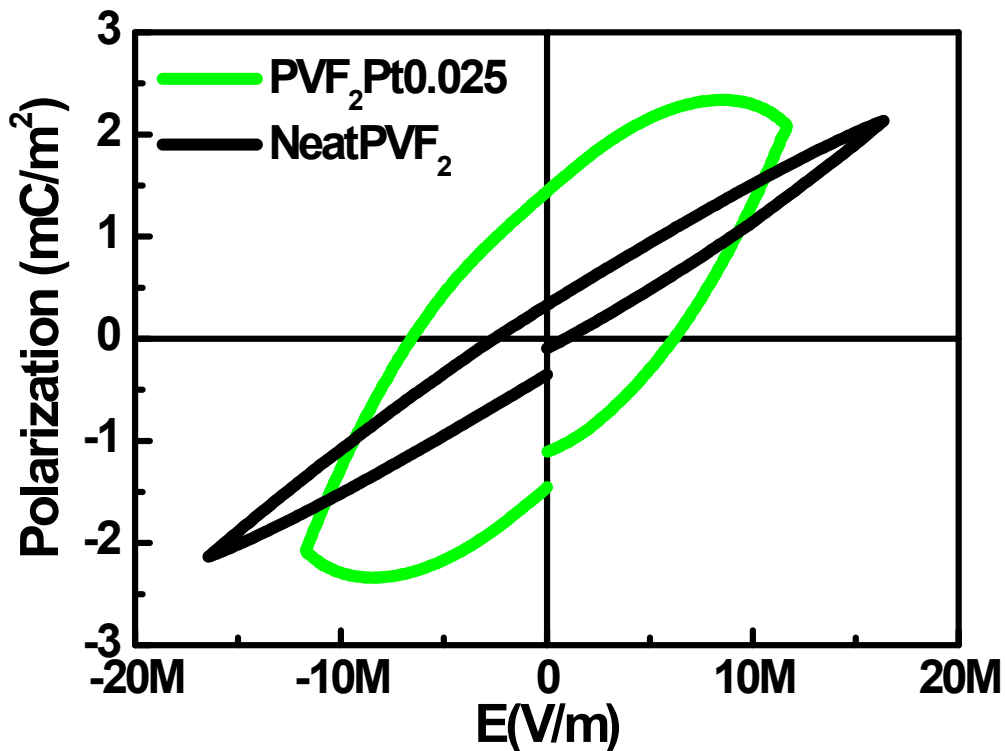

**Figure S9.** P-E loops of NeatPVF<sub>2</sub> and PVF<sub>2</sub>Pt0.025 films.

Figure S9 compares the polarization-electric field ( $P$ - $E$ ) loops of the NeatPVF<sub>2</sub> and PVF<sub>2</sub>Pt0.025 films. Ferroelectric  $P$ - $E$  loops characterized with hysteresis, remnant polarization ( $P_r$ ) and coercive field ( $E_c$ ) have been observed in the films. A more pronounced improvement (five times) of  $P_r$  value in Pt-NPs doped PVDF film (PVF<sub>2</sub>Pt0.025) compared to the NeatPVF<sub>2</sub> originates due to the presence of polar  $\beta$ - and  $\gamma$ - phases. Furthermore, it can be improved by controlling the film preparation parameters where the orientation of the molecular dipoles can be monitored<sup>4</sup> (main article). In addition the coercive field improved (six times) in Pt-NPs doped PVDF film (PVF<sub>2</sub>Pt0.025) than the NeatPVF<sub>2</sub> is well correlated with the enhancement of crystallite size and chain orientation. Since the piezoelectric coefficient is

directly proportional to the remnant polarization in the PVDF based ferroelectric polymers, higher  $P_r$  and  $E_c$  are anticipated in  $PVF_2Pt0.25$  and  $PVF_2Pt1.0$  films.

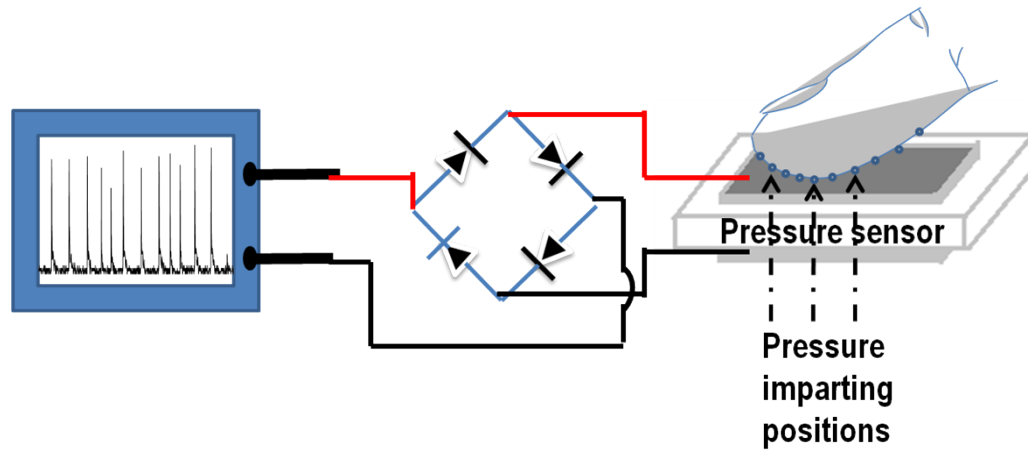

**Figure S10.** Schematic circuit diagram with full wave bridge rectifier for detecting the human finger touch signal (in terms of voltage) from tactile sensor made with PVDF films.

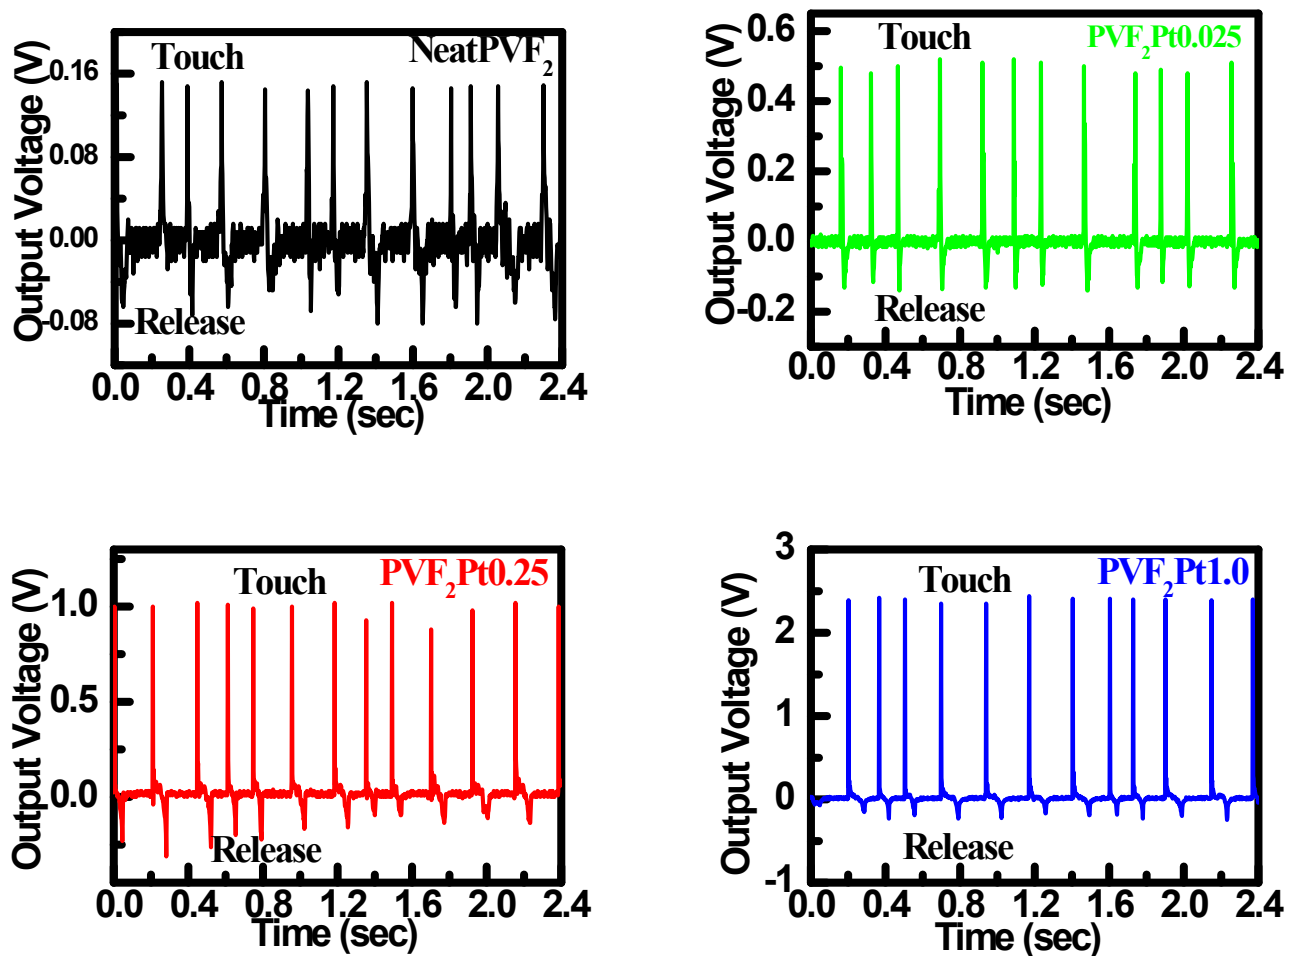

**Figure S11.** The human finger touch responses from tactile sensors made from of Neat PVDF as well as Pt-NPs doped PVDF films are shown.

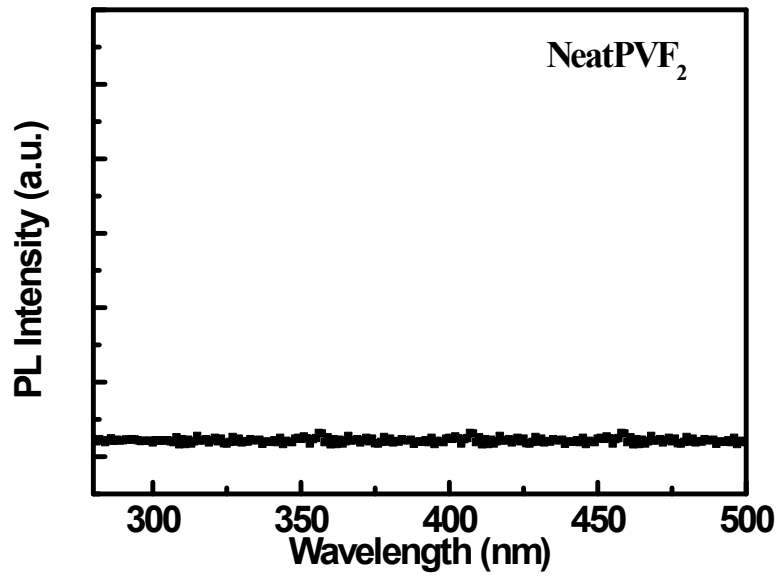

**Figure S12.** The PL-signal from NeatPVF<sub>2</sub> film, which gives no luminescence under the excitation of 260 nm.

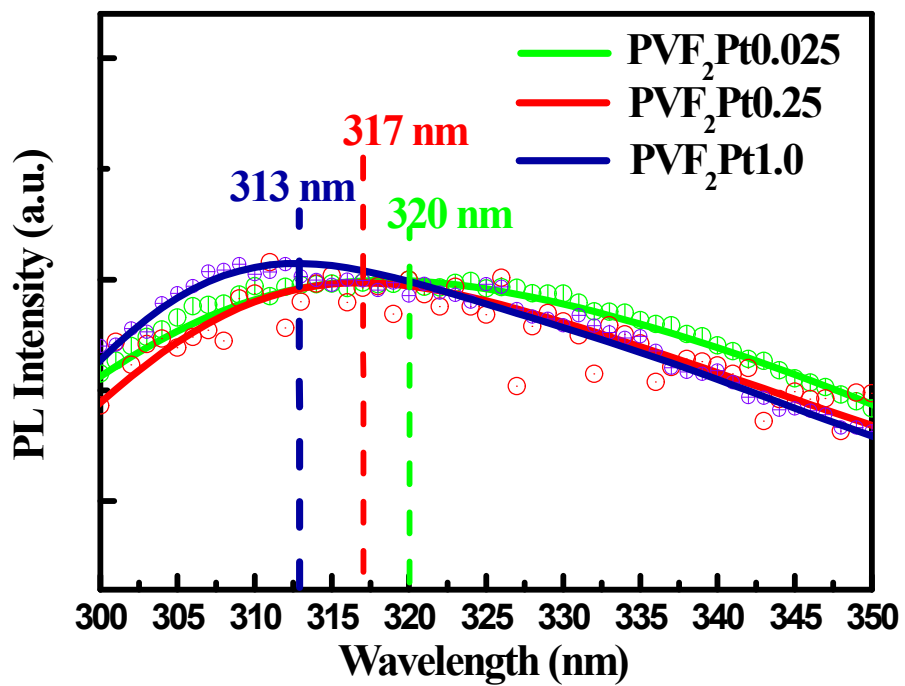

**Figure S13.** The blue shifts of PL-spectrum with increasing amount of Pt-NPs in doped PVDF films are shown.
